# Supplementary material for: Ocean warming and species range shifts affect rates of ecosystem functioning by altering consumer–resource interactions
Source: PubMed Central journal article supplement (PMC11475527; doi:10.1002/ecy.3341), 2021-04-30
Supplement: ECY-102-e03341-s001.pdf [file ECY-102-e03341-s001.pdf]

**Supporting Information.** Gilson, A.R., D.A. Smale, and N. O’Connor. 2021. Ocean warming and species range shifts affect rates of ecosystem functioning by altering consumer–resource interactions. *Ecology*.

## Appendix S1

Table S1. Mesocosm temperatures  $\pm$  1SD ( $^{\circ}$ C) averaged across the experimental period for experimentally manipulated temperature treatments (fixed, two levels: ambient, heated) to test for effects of temperature on respiration and consumption rates and secondary production in a range of consumers (*Echinus esculentus*, *Gibbula umbilicalis* and *Gammarus* spp.).

| Experiment            | Ambient         | Heated          |
|-----------------------|-----------------|-----------------|
| <i>E. esculentus</i>  | 13.9 $\pm$ 1    | 15.9 $\pm$ 0.99 |
| <i>G. umbilicalis</i> | 14.4 $\pm$ 0.48 | 16.4 $\pm$ 0.68 |
| <i>Gammarus</i> spp.  | 12.9 $\pm$ 1.3  | 15 $\pm$ 1.05   |

Table S2. Mesocosm experiments testing for the effects of differences in kelp community composition (cold-water affinity, *Laminaria digitata* and *Saccharina latissima* versus warm-water affinity, *Laminaria ochroleuca* and *Sacchoriza polyschides*) on rates of respiration, consumption and secondary production of three consumer species (the urchin, *Echinus esculentus*, gastropod, *Gibbula umbilicalis* and amphipod, *Gammarus* spp.). Each experimental treatment was designed to mimic consumer density at local sites. Controls were treatment combinations without consumers present to quantify natural macroalgal biomass breakdown/growth independent from effects of consumers. Mesocosm dimensions differ between experiments owing to different size mesocosms. L = length, W = width, H = height, D = diameter, V = volume.

| Experiment            | Mesocosm dimensions              | Individuals per mesocosm | Treatment replication (n) | Control replication (n) | Start date | Duration (weeks) |
|-----------------------|----------------------------------|--------------------------|---------------------------|-------------------------|------------|------------------|
| <i>E. esculentus</i>  | L 55.5 X W 35.5 X H 22<br>V 45 L | 1                        | 5                         | 3                       | 31/08/17   | 12               |
| <i>G. umbilicalis</i> | H 26 X D 25<br>V 10 L            | 4                        | 8                         | 8                       | 31/08/17   | 4                |
| <i>Gammarus</i> spp.  | H 26 X D 25<br>V 10 L            | 10                       | 8                         | 8                       | 02/11/17   | 2                |
